# Supplementary material for: Cleaved CD44 intracellular domain supports activation of stemness factors and promotes tumorigenesis of breast cancer
Source: PubMed Central journal article supplement (PMC4496178; doi:10.18632/oncotarget.3325), 2015-04-02
Supplement: oncotarget-06-8709-s001.pdf [file oncotarget-06-8709-s001.pdf]

## SUPPLEMENTARY FIGURES AND TABLE

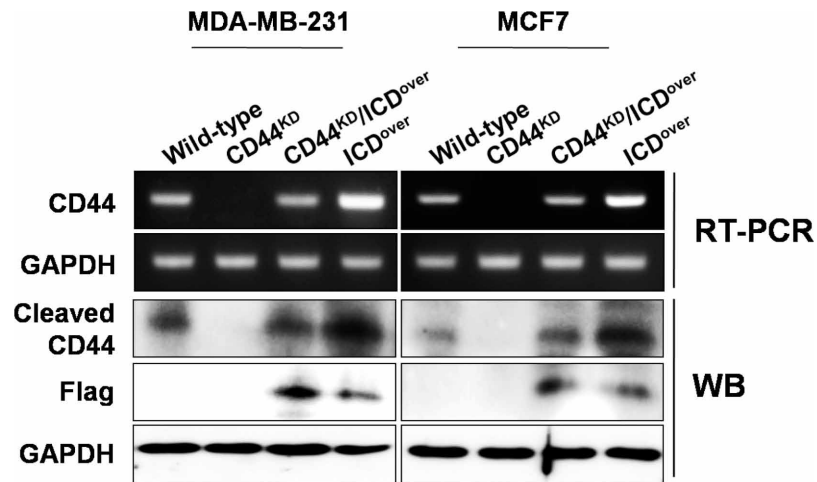

**Supplementary Figure S1: Ablation of CD44 and overexpression of CD44ICD by lentiviral vectors.** MDA-MB-231 (upper panel) and MCF7 (lower panel) cells were transfected with control and CD44-depleted cells (CD44<sup>KD</sup>), CD44-depleted cells with overexpression of CD44ICD (CD44<sup>KD</sup>/ICD<sup>over</sup>) and wild-type cells with overexpression of CD44ICD (ICD<sup>over</sup>) using a lentiviral vector. The mRNA (upper panel) and protein levels (lower panel) of CD44 and Flag were detected by RT-PCR and western blotting, respectively.

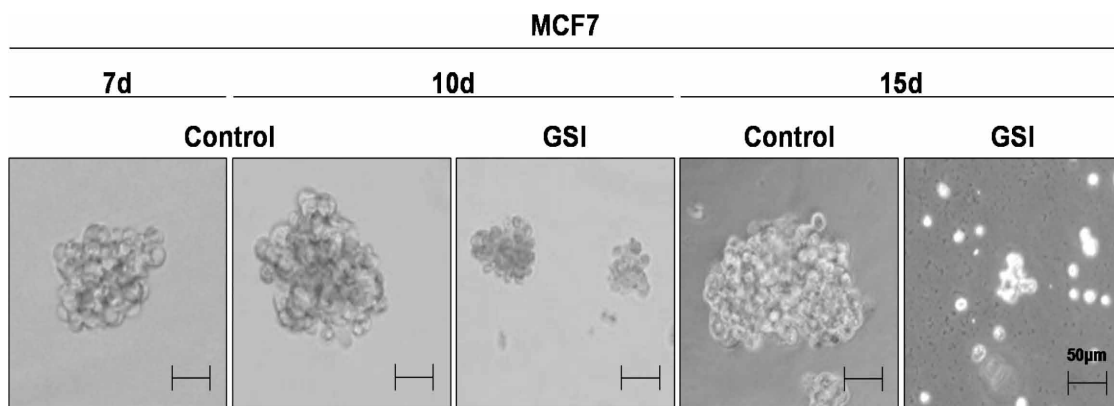

**Supplementary Figure S2: Gamma secretase inhibitor as an inhibitor of CD44ICD cleavage prevents sphere formation in breast cancer cells.** After 7 days of mammosphere culture, 5  $\mu$ M of GSI or vehicle were added and the cell culture was continued. Mammosphere forming ability was measured under sphere forming conditions on the indicated days.

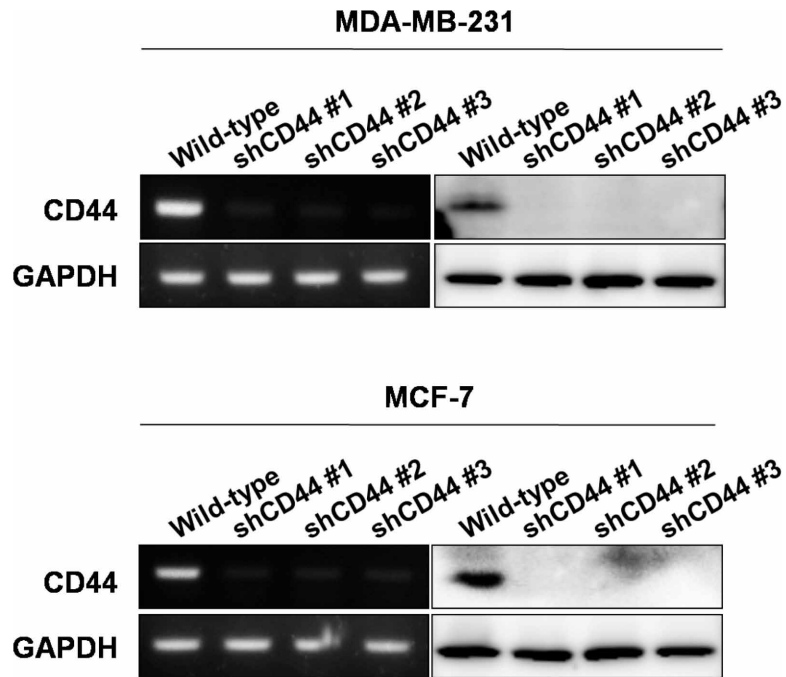

**Supplementary Figure S3: Ablation of CD44 by CD44 shRNA.** MDA-MB-231 (upper panel) and MCF7 (lower panel) cells were transfected with control and CD44 shRNA lentiviral expression vectors. The mRNA (left panel) and protein levels (right panel) of CD44 were detected by RT-PCR and western blotting, respectively.

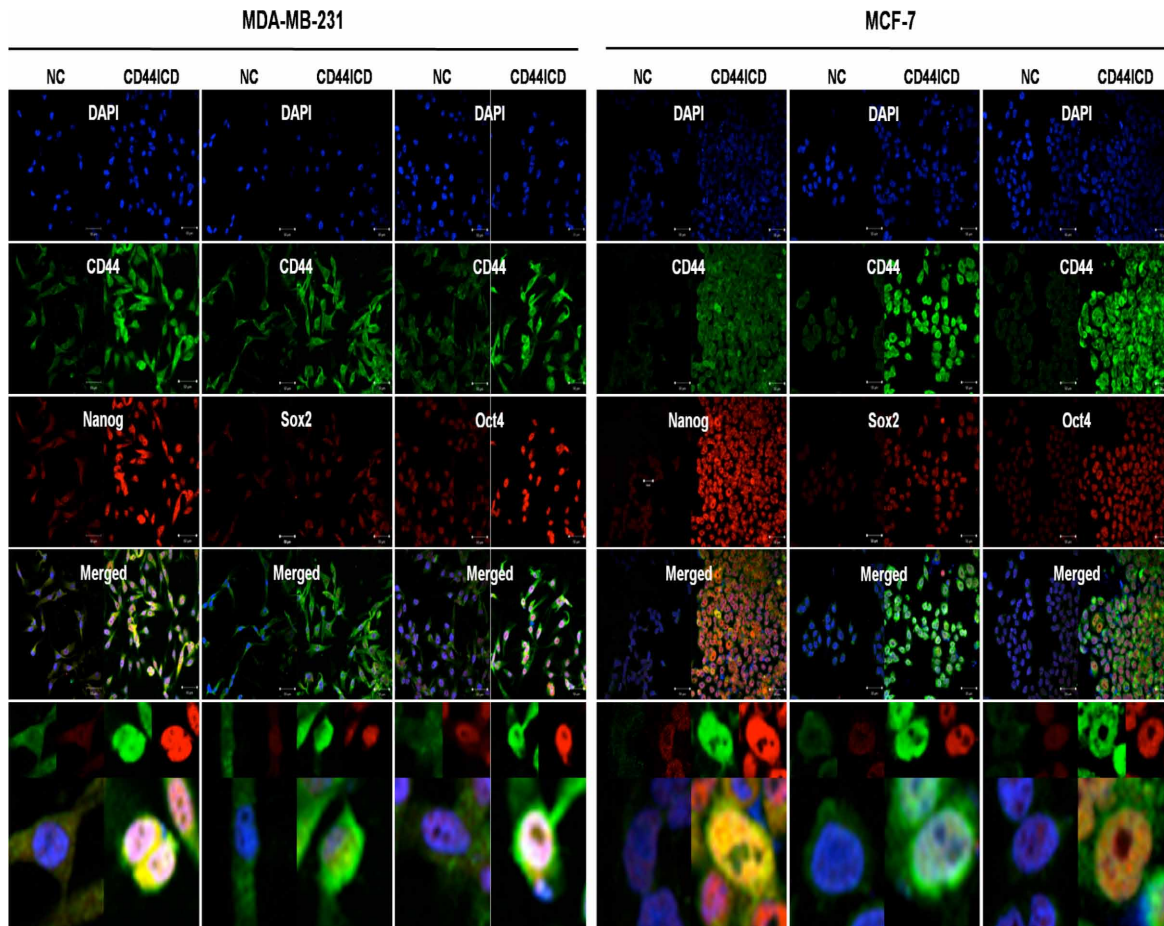

**Supplementary Figure S4: Overexpression of CD44ICD induced nuclear localization of stemness factors, Nanog, Sox2, and Oct4.** Co-localization of CD44ICD with stemness factors was detected after CD44ICD overexpression using immunocytochemical analysis.

**Supplementary Table S1: Primer lists for cloning and RT-PCR**

| Primer           | Sequence (5' to 3')                    | Applications         |
|------------------|----------------------------------------|----------------------|
| CD44_For         | TTCCCAAAAAGAGGCTGAGA                   | CD44 RT-PCR          |
| CD44_Rev         | CAATGTTGCAAGGGTTTGTG                   |                      |
| Nanog_For        | ACCTTCCAATGTGGAGCAAC                   | Nanog RT-PCR         |
| Nanog_Rev        | GAATTTGGCTGGAAGTGCAT                   |                      |
| Sox2_For         | AAAACAGCCCGGACCGCGTC                   | Sox2 RT-PCR          |
| Sox2_Rev         | CTCGTCGATGAACGGCCGCT                   |                      |
| Oct4_For         | CTCACCTGGGGTTTCTATT                    | Oct4 RT-PCR          |
| Oct4_Rev         | CTGGTTCGCTTTCTCTTTCG                   |                      |
| GAPDH_For        | GGCTGCTTTTAACTCTGGTA                   | GAPDH RT-PCR         |
| GAPDH_Rev        | ACTTGATTTTGGAGGGATCT                   |                      |
| CD44_For         | GATCTTAATTAACATGGACAAGTTTTGGTGGCAC     | CD44 cloning         |
| CD44_Rev         | GATCGCGCCGCTTATTACACCCCAATCTTCATGTCCAC |                      |
| CD44ICD_For      | GATCTTAATTAACGCAGTCAACAGTCGAAGAAGG     | CD44ICD cloning      |
| CD44ICD_ΔN17_For | GATCTTAATTAACAGTGGCAATGGAGCTGTGGAG     | CD44ICD_ΔN17 cloning |
| CD44ICD_ΔN35_For | GATCTTAATTAACAGCAAGTCTCAGGAAATGGTG     | CD44ICD_ΔN35 cloning |
| CD44ICD_ΔC19_Rev | GATCGCGCCGCTTATTACTGGTCTGGAGTTTCTGACGA | CD44ICD_ΔC19 cloning |
| CD44ICD_Mut_For  | AGTCGAAGAAGGTGTGGGCAG                  | CD44ICD_Mut cloning  |
| CD44ICD_Mut_Rev  | GCAAACCTGCAAGAACCAAAGCC                | CD44ICD_Mut cloning  |
